# Supplementary material
Source: Springer Nature journal article supplement (https://www.springermedizin.de/resource/supplementary/12885_2011_2846_MOESM1_ESM.pdf/9462046)

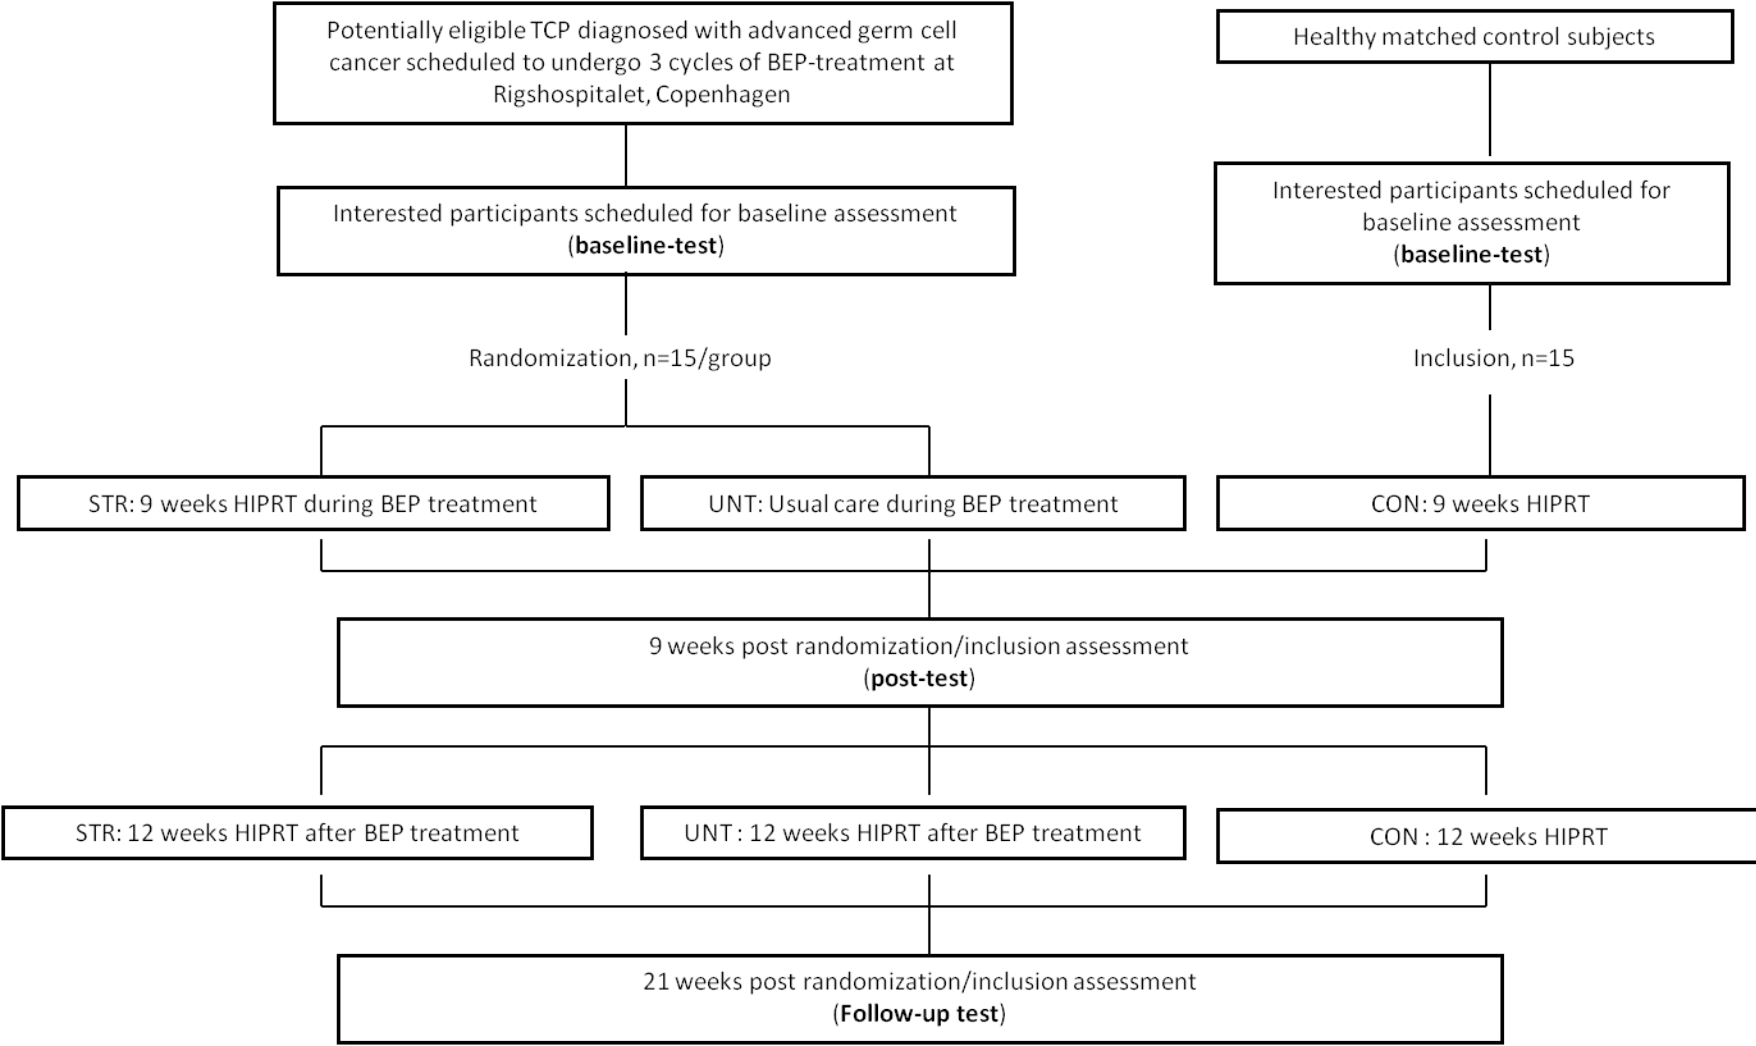

Supplement: MOESM1 [file 9462046]
